# Supplementary material for: A dsRNA virus with filamentous viral particles
Source: PubMed Central journal article supplement (PMC5537263; doi:10.1038/s41467-017-00237-9), 2017-08-01
Supplement: 41467_2017_237_MOESM1_ESM.pdf [file 41467_2017_237_MOESM1_ESM.pdf]

**File name:** Supplementary Information

**Description:** Supplementary Figures, Supplementary Tables and Supplementary References

**File name:** Peer Review File

**Description:**

|                    |             | IV           |        | V             |        | VI          |
|--------------------|-------------|--------------|--------|---------------|--------|-------------|
| CcFV-1             | query       | D.#.&D       |        | G..SG...T.&.  |        | GDD.&&      |
| AfuTmV-1           | CDP74618    | DIKWWDANMCE  | [ 54 ] | GCMPSGSYTSM   | [ 28 ] | TLISYGDNQLI |
| BbPmV-1            | LN896307    | DITKWWDANMC  | [ 55 ] | GCMPSGSFYTSLV | [ 42 ] | TLISYGDNQLF |
| BbPmV-2            | LN896318    | DIEKWWDANMS  | [ 55 ] | GCMPSGSFYTSLL | [ 42 ] | ALLSYGDNQLI |
| BdRV-1             | AKE49495    | DILKWWDASVV  | [ 55 ] | GTMPSGSYTSLI  | [ 42 ] | ALLSYGDNQLI |
| RHDV               | 1KHV_A      | DIEKWWDANMC  | [ 55 ] | GCMPSGSYTSLI  | [ 42 ] | TLVSYGDNQLI |
| HCV                | 1GX6_A      | DYSKWWDSTMS  | [ 43 ] | RGLPSGMPFTSVI | [ 31 ] | PFYTYGDDGVY |
| BVDV               | 1S4F_A      | DTRCFDSTVTE  | [ 42 ] | RCRASGVLTTSCG | [ 21 ] | TXLVNGDDLIV |
| RCNMV              | gi 133643   | DTKAWDTQVTS  | [ 45 ] | GQRGSGQPDTAS  | [ 28 ] | RIHVCGDDGFL |
| FCVC6              | gi 6226677  | DASRFDQHCSV  | [ 47 ] | GCRMSGDINTGLG | [ 20 ] | SLANNGDDCVL |
| <i>B. cinicola</i> | gi 15375092 | DYSKWWDSTQSP | [ 43 ] | SGLPSGMPFTSVI | [ 32 ] | DMMTYGDDGVY |
| SPMMV              | gi 25013881 | DFSKFDSTIPP  | [ 47 ] | GGNVSGSFLTSAL | [ 24 ] | DLFILGDDFIL |
| AEV                | gi 40538720 | DGSRFDSSIPP  | [ 47 ] | RGNNSGQPSTVVD | [ 23 ] | KYVCNGDILLI |
| CtRLV              | gi 2582372  | DFSNYDASLSP  | [ 43 ] | GSMPSGTPATSVL | [ 28 ] | KILTYGDDVLF |
|                    |             | DASRFDLHVS   | [ 47 ] | GGRCSGSDTSLG  | [ 21 ] | EVANDGDDQVL |

**Supplementary Fig. 1** Three conserved motifs of deduced RNA-dependent RNA polymerase (RdRp) from *Colletotrichum camelliae* filamentous virus 1 (CcFV-1) and other RNA viruses or organisms corresponding to motifs IV, V, and VI, respectively, as revealed by BLASTp. The “#” symbol refers to residues S or T, and “&” denotes any bulky hydrophobic residue (L, I, V, M, F, Y, W). Numbers within the brackets indicate the number of amino acids not shown. Virus names and acronyms are listed as follows: RHDV (*Rabbit hemorrhagic disease virus*), HCV (*Hepatitis C virus*), BVDV (*Bovine viral diarrhea virus*), RCNMV (*Red clover necrotic mosaic virus*), FCVC6 (*Feline calicivirus strain CFI/68 FIV*), *B. cinicola* (*Bryopsis cinicola*), SPMV (*Sweet potato mild mottle virus*), AEV (*Avian encephalomyelitis virus*), CtRLV (*Carrot red leaf luteovirus-associated RNA*), AfuTmV-1 (*Aspergillus fumigatus* tetramycovirus-1), BdRV-1 (*Botryosphaeria dothidea virus 1*), BbPmV-1 (*Beauveria bassiana* polmycovirus-1), BbPmV-2 (*Beauveria bassiana* polmycovirus-2).

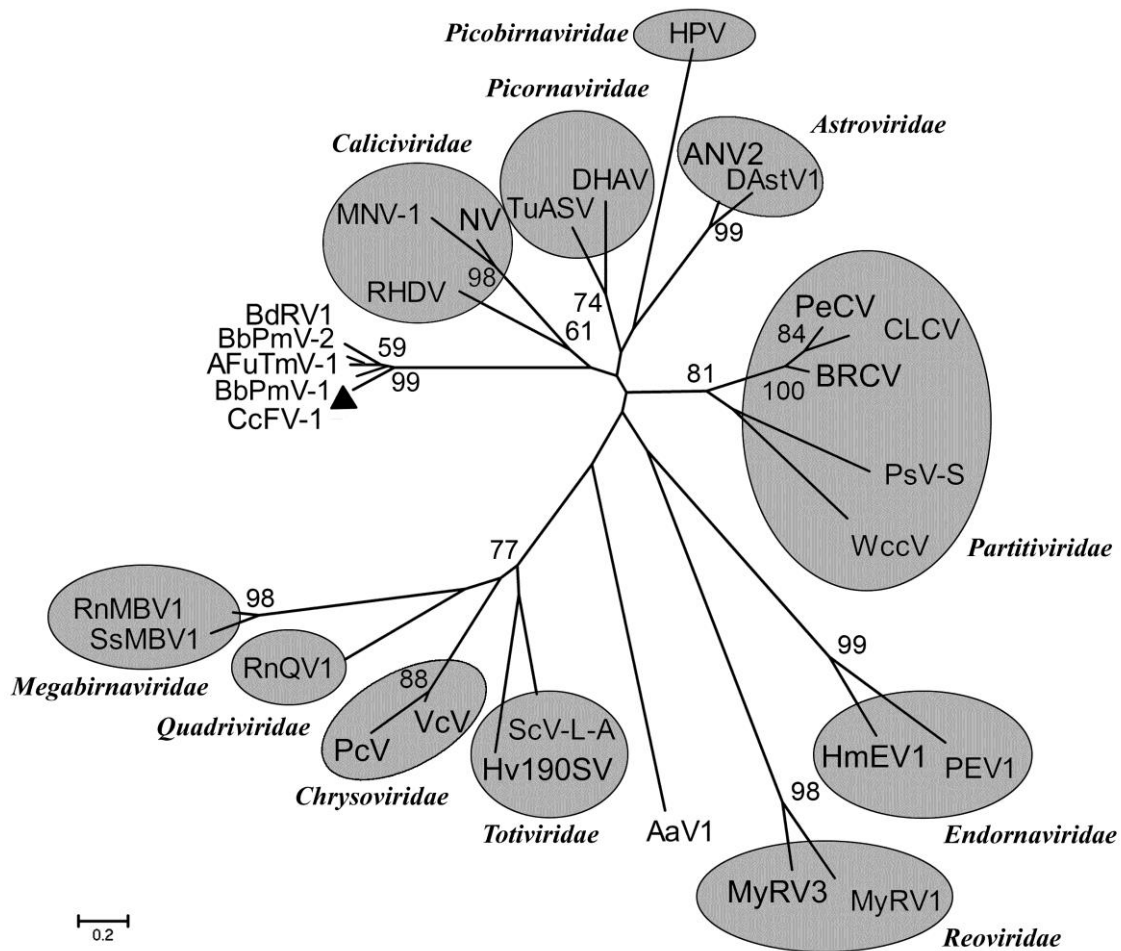

**Supplementary Fig. 2** Phylogenetic analysis of the deduced RdRp sequences of CcFV-1 and selected members of all eight dsRNA virus families and unclassified dsRNA viruses belonging to group III and three (+)RNA virus families closer to CcFV-1, as listed in Supplementary Table 7. The phylogenetic trees were constructed as previously described<sup>1</sup>.

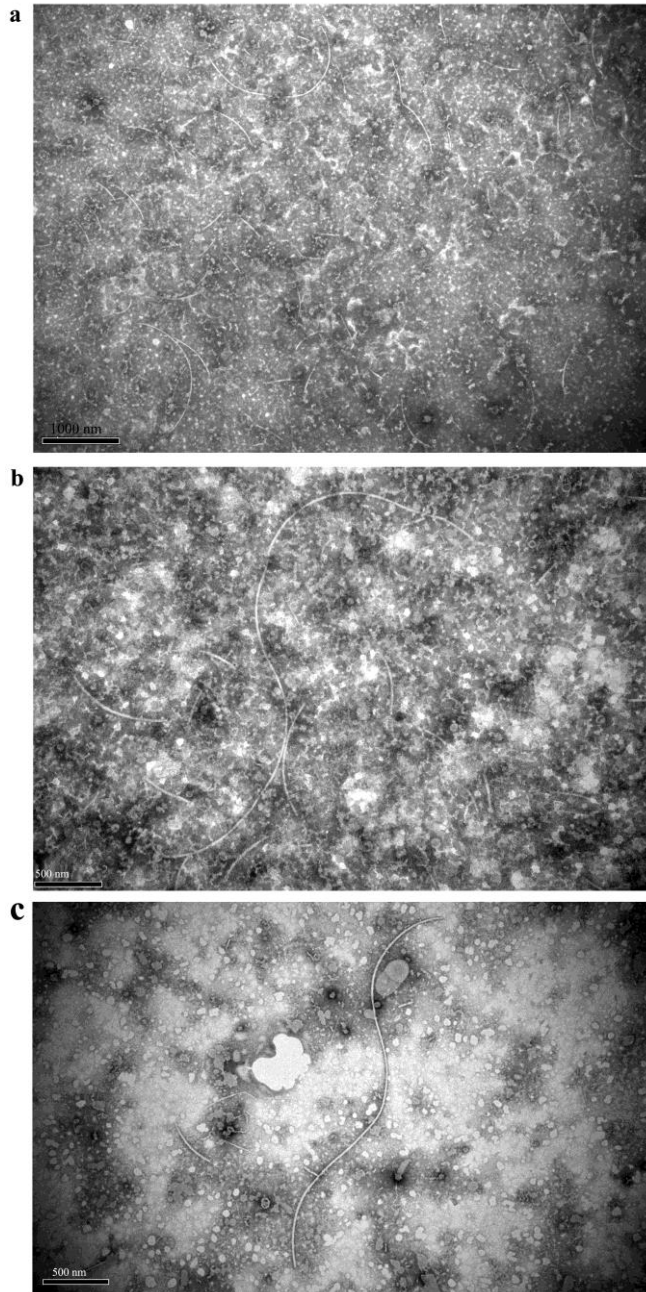

**Supplementary Fig. 3** Transmission electron microscopy (TEM) image of virus-like particles extracted from *C. camelliae* strain LT-3-1. (a) Representative virus-like particles with filamentous particles longer than 127.1 nm were observed in the crude extract. Scale bar, 1000 nm. (b) Virus-like particles of 4426.7 nm in length and 12.4 nm in width (no. 6 in Fig. 32) observed in the 30% sucrose fraction. Scale bar, 500 nm. (c) The longest filamentous particles purified after centrifugation in 1.45 g/cm<sub>3</sub> CsCl. Scale bar, 500 nm.

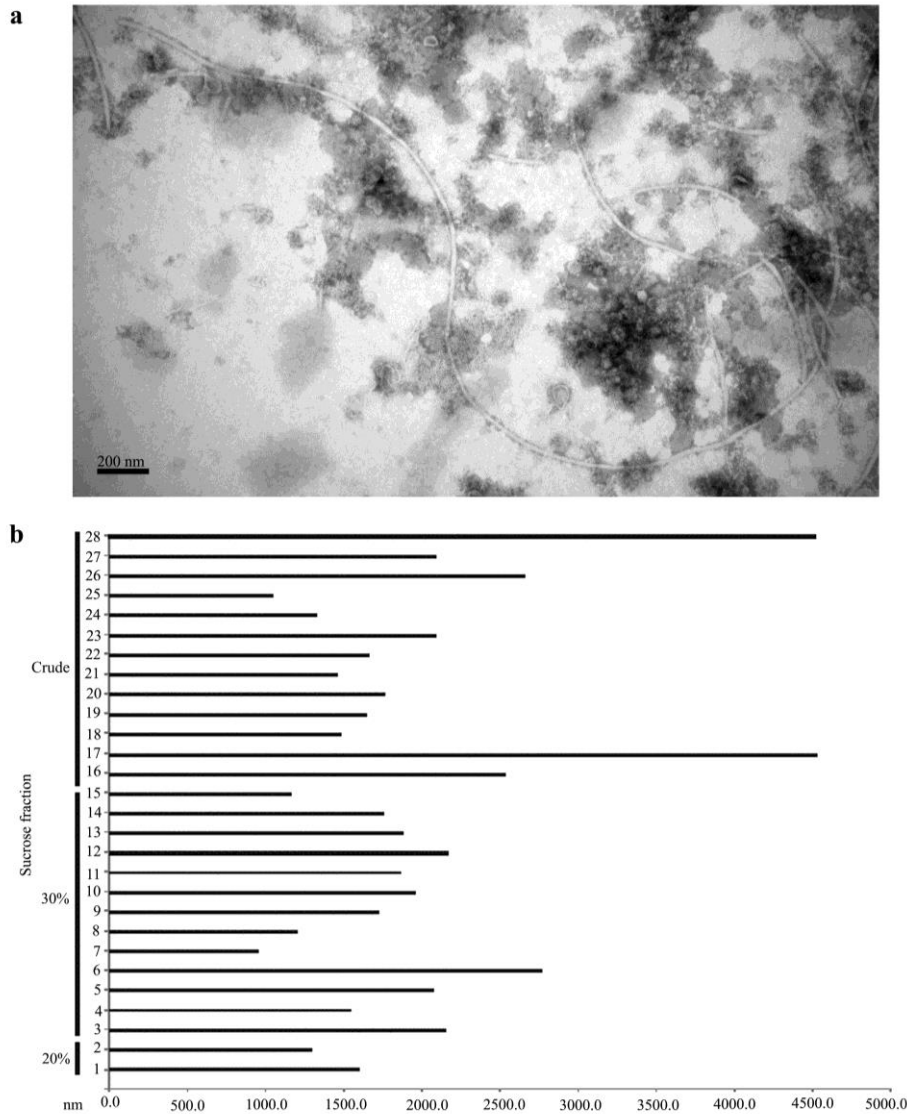

**Supplementary Fig. 4** Immunosorbent electron microscopy (ISEM) images of virus-like particles decorated by PAb-P4 and a histogram of the sizes of decorating particles longer than 1000.0 nm. (a) The second longest virus-like particle in the crude extract decorated by PAb-P4 at an 8000-fold dilution observed by ISEM. Scale bar, 200 nm. (b) A histogram of the sizes of decorated particles longer than 1000.0 nm in the extracted LT-3-1 crude extract and in fractions corresponding to 30% and 20% sucrose, respectively, following sucrose gradient centrifugation. The numbers on the vertical axis indicate the numbers randomly assigned to virus-like particles.

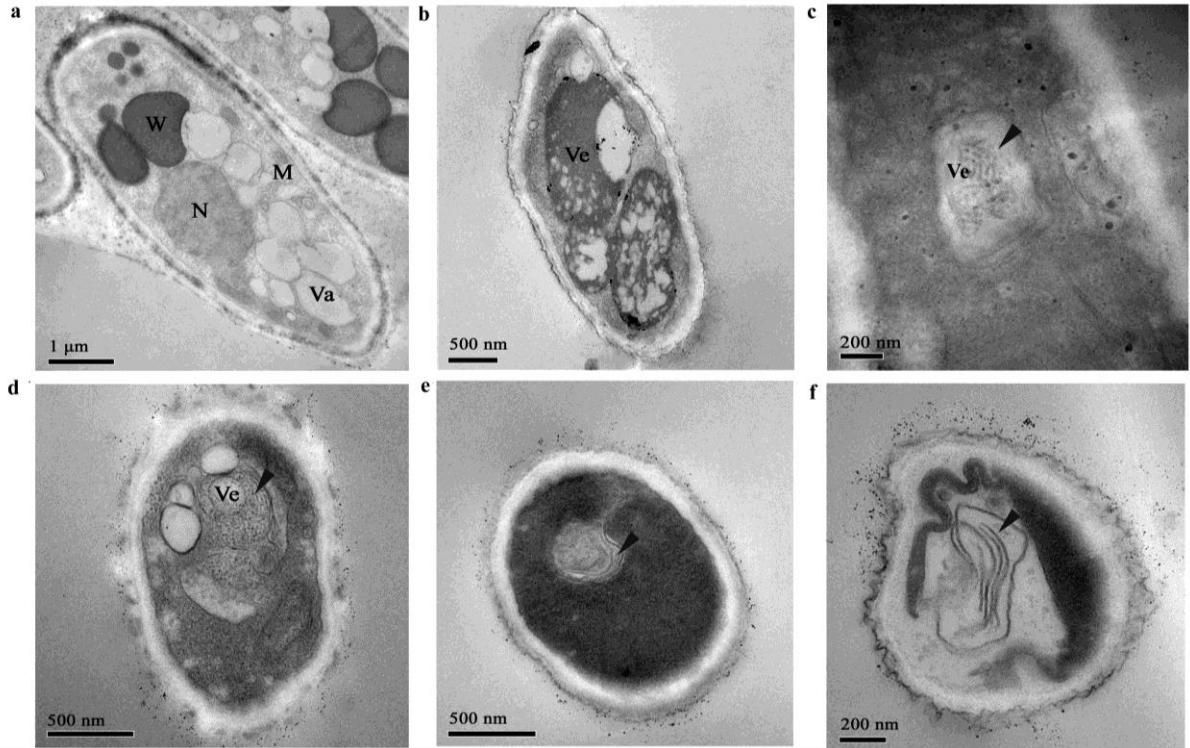

**Supplementary Fig. 5** TEM images of ultrathin hyphal sections of *C. camelliae* strains LT-3-1 and LT-3-1D2. (a) Representative ultrathin hyphal section of strain LT-3-1D1 showing normal cellular structures. Scale bar, 1000 nm. (b) Representative ultrathin hyphal section of strain LT-3-1 showing degeneration. Scale bar, 500 nm. (c and d) Filamentous virus-like particles observed in the vesicles of strain LT-3-1 cells. The arrows indicate filamentous virus-like particles. Scale bars, 200 and 500 nm, respectively. (e and f) Unclear structures observed in the cytoplasm of hyphal cells of strain LT-3-1. Scale bars, 500 and 200 nm, respectively. N, nucleus; Va, vacuole; Ve, vesicle; M, mitochondrion; W, Woronin body.

**Supplementary Table 1** Percent identity of the termini of dsRNAs 1 to 8.

|        | dsRNA1 | dsRNA2 | dsRNA4 | dsRNA3 | dsRNA5 | dsRNA6 | dsRNA8 | dsRNA7 |
|--------|--------|--------|--------|--------|--------|--------|--------|--------|
| dsRNA1 |        | 76.5*  | 73.5   | 73.5   | 64.5   | 50     | 52.9   | 52.9   |
| dsRNA2 | 33.7** |        | 66.3   | 75.6   | 70.9   | 19.2   | 30.2   | 24.4   |
| dsRNA4 | 21.1   | 24.3   |        | 63.4   | 68.8   | 26.7   | 37.8   | 32.6   |
| dsRNA3 | 45.3   | 25     | 31.2   |        | 66.9   | 16.9   | 29.1   | 19.2   |
| dsRNA5 | 31.7   | 25.4   | 23.8   | 47.6   |        | 19.1   | 36.4   | 23.3   |
| dsRNA6 | 24.2   | 31.1   | 22.4   | 24     | 22.2   |        | 45.4   | 47.1   |
| dsRNA8 | 28.4   | 19.4   | 24.4   | 28.1   | 30.2   | 22.1   |        | 47.7   |
| dsRNA7 | 31.6   | 25.2   | 26.5   | 27.1   | 27     | 25.8   | 26.3   |        |

\* and \*\*, percent identity of the 5- and 3-termini respectively.

**Supplementary Table 2** Summary of the results of a BLASTp search for deduced proteins encoded by dsRNAs 1 to 8.

| ORF No.                   | Species                                | Proteins                                                   | Total score | Query cover (%) | E value | Identity (%) | GenBank accession no. |
|---------------------------|----------------------------------------|------------------------------------------------------------|-------------|-----------------|---------|--------------|-----------------------|
| 1                         | Cladosporium cladosporioides virus 1   | putative RNA-dependent RNA polymerase                      | 741         | 99              | 0       | 53           | YP_009052470          |
|                           | Aspergillus fumigatus tetramycovirus-1 | RNA-dependent RNA polymerase                               | 522         | 84              | 7E-172  | 47           | CDP74618              |
|                           | Alternaria tenuissima virus            | RNA-dependent RNA polymerase                               | 508         | 70              | 9E-170  | 54           | AJP08049              |
|                           | Botryosphaeria dothidea virus 1        | RNA-dependent RNA polymerase                               | 504         | 84              | 4E-165  | 47           | AKE49495              |
|                           | Turkey astrovirus                      | RNA-dependent RNA polymerase                               | 43.5        | 25              | 1.2     | 25           | ABX46574              |
|                           | Avastrovirus 3                         | RNA-dependent RNA polymerase                               | 42.7        | 22              | 2.2     | 23           | ABX46565              |
|                           | Turkey astrovirus 2                    | RNA-dependent RNA polymerase                               | 40.8        | 21              | 5.2     | 25           | AFG33157              |
| 2                         | Cladosporium cladosporioides virus 1   | hypothetical protein                                       | 514         | 99              | 6E-171  | 46           | YP_009052471          |
|                           | Aspergillus fumigatus tetramycovirus-1 | hypothetical protein                                       | 232         | 94              | 4E-63   | 32           | CDP74619              |
|                           | Alternaria sp. FA0703                  | hypothetical protein                                       | 211         | 92              | 1E-55   | 31           | ACL80752              |
|                           | Botryosphaeria dothidea virus 1        | hypothetical protein                                       | 202         | 92              | 2E-52   | 32           | AKE49496              |
| 3                         | Cladosporium cladosporioides virus 1   | hypothetical protein                                       | 491         | 89              | 5E-164  | 47           | YP_009052472          |
|                           | Aspergillus fumigatus tetramycovirus-1 | Methyl transferase                                         | 140         | 85              | 1E-31   | 26           | CDP74620              |
|                           | Botryosphaeria dothidea virus 1        | hypothetical protein                                       | 127         | 74              | 1E-27   | 27           | AKE49497              |
|                           | Thermovenabulum gondwanense            | Polyamine aminopropyltransferase                           | 48.5        | 19              | 0.011   | 28           | KYO64538              |
|                           | Aspergillus flavus AF70                | oxidoreductase, short chain dehydrogenase/reductase family | 45.4        | 20              | 0.13    | 29           | KOC18052              |
|                           | Amycolatopsis keratiniphila            | nitroreductase                                             | 43.5        | 11              | 0.14    | 36           | WP_063275982          |
|                           | Amycolatopsis orientalis               | nitroreductase                                             | 43.5        | 11              | 0.14    | 36           | WP_046199795          |
|                           | Aspergillus oryzae RIB40               | oxidoreductase, short chain dehydrogenase/reductase family | 44.7        | 20              | 0.26    | 29           | XP_001727173          |
|                           | Amycolatopsis orientalis HCCB10007     | hypothetical protein AORI_3756                             | 42.7        | 11              | 0.29    | 36           | AGM06341              |
|                           | Labrenzia sp. DG1229                   | methyltransferase type 11                                  | 43.5        | 18              | 0.34    | 28           | WP_029061648          |
|                           | Nocardia niwae                         | hypothetical protein                                       | 43.9        | 18              | 0.35    | 28           | WP_063019054          |
|                           | Amycolatopsis azurea                   | nitroreductase                                             | 41.6        | 11              | 0.62    | 33           | WP_052014240          |
|                           | Desulfuromonas acetoxidans             | SAM-dependent methyltransferase                            | 43.9        | 27              | 0.82    | 22           | WP_005999076          |
|                           | Mycobacterium kansasii                 | 6-O-methylguanine DNA methyltransferase                    | 42          | 23              | 1.1     | 29           | KZS84804              |
|                           | Amycolatopsis nigrescens               | hypothetical protein                                       | 41.2        | 9               | 1.1     | 36           | WP_020673584          |
|                           | Amycolatopsis jejuensis                | nitroreductase                                             | 40.8        | 11              | 1.1     | 37           | WP_033287732          |
| Amycolatopsis sp. MJM2582 | nitroreductase                         | 40.8                                                       | 11          | 1.1             | 32      | WP_052120702 |                       |
| 4                         | Cladosporium cladosporioides virus 1   | hypothetical protein                                       | 180         | 86              | 7E-52   | 40           | YP_009052473          |
|                           | Aspergillus fumigatus tetramycovirus-1 | PAS-rich protein                                           | 144         | 81              | 7E-38   | 41           | CDP74621              |
|                           | Botryosphaeria dothidea virus 1        | hypothetical protein                                       | 143         | 83              | 1E-37   | 38           | AKE49498              |
|                           | Cyanothece sp. CCY0110                 | hypothetical protein                                       | 39.7        | 15              | 1.1     | 35           | WP_008275724          |
| 5-1                       | Drosophila melanogaster                | short stop, isoform K                                      | 40          | 36              | 4.3     | 27           | NP_001137659          |
|                           | Drosophila melanogaster                | short stop, isoform G                                      | 40          | 36              | 4.3     | 27           | NP_725335             |
|                           | Drosophila yakuba                      | uncharacterized protein Dyak_GE13333, isoform AH           | 39.7        | 36              | 4.4     | 27           | XP_015052457          |
| 5-2                       | no hits                                | /                                                          | /           | /               | /       | /            |                       |
| 6                         | Thiomonas sp. CB2                      | conserved hypothetical protein                             | 37          | 42              | 7.3     | 32           | CDW93413              |
| 7                         | Olsenella sp. oral taxon 807           | transketolase                                              | 38.1        | 37              | 4.9     | 32           | WP_050341181          |
| 8-1                       | no hits                                | /                                                          | /           | /               | /       | /            |                       |
| 8-2                       | no hits                                | /                                                          | /           | /               | /       | /            |                       |



**Supplementary Table 3** Predicted homology proteins by HHpred tool with the ones deduced on the basis of open reading frames (ORFs) of dsRNAs 1 to 8 of *Colletotrichum camelliae* filamentous virus 1 (CcFV-1).

| No. | Hit    | Homology protein                                                                                                                 | Host                                                    | Prob (%) | E-value             | Score | Query   | Iden(%) | Simi * |
|-----|--------|----------------------------------------------------------------------------------------------------------------------------------|---------------------------------------------------------|----------|---------------------|-------|---------|---------|--------|
| 1   | 3uqs_A | RNA-dependent RNA polymerase; transferase                                                                                        | <i>Murine norovirus</i><br>(Caliciviridae)              | 100.0    | 5.9E <sup>-50</sup> | 457.1 | 211-695 | 14.0    | 0.310  |
|     | 2ckw_A | RNA-directed RNA polymerase; hydrolase, nucleotide-binding, nucleotidyltransferase, covalent protein-RNA linkage, RNA elongation | <i>Sapporo virus</i><br>(Caliciviridae)                 | 100.0    | 3.3E <sup>-49</sup> | 450.0 | 211-688 | 17.0    | 0.187  |
|     | 4zpc_A | RNA-dependent RNA polymerase; transcription                                                                                      | <i>Coxsackievirus B3</i><br>(Picornaviridae)            | 100.0    | 1.9E <sup>-48</sup> | 438.6 | 210-652 | 18.0    | 0.189  |
|     | 3bso_A | RNA dependent RNA polymerase; RNA-dependent RNA polymerase, viral replication, antiviral E inhibitor, helicase, hydrolase        | <i>Norwalk virus</i><br>(Caliciviridae)                 | 100.0    | 4.0E <sup>-48</sup> | 440.9 | 211-688 | 15.0    | 0.159  |
|     | 1khv_A | RNA-directed RNA polymerase; RNA-dependent RNA polymerase, transferase                                                           | <i>Rabbit hemorrhagic disease virus</i> (Caliciviridae) | 100.0    | 1.3E <sup>-47</sup> | 436.9 | 211-686 | 16.0    | 0.111  |
|     | 4wyw_A | RNA-directed RNA polymerase 3D-POL; closed-right hand RNA dependent RNA polymerase picornavirus, transferase                     | <i>Foot-and-mouth disease virus</i> (Picornaviridae)    | 100.0    | 2.1E <sup>-47</sup> | 432.2 | 211-686 | 17.0    | 0.181  |
|     | 1xr7_A | Genome polyprotein; RNA-dependent RNA polymerase, transferase                                                                    | <i>Human rhinovirus 16</i> (Picornaviridae)             | 100.0    | 1.0E <sup>-45</sup> | 415.6 | 210-652 | 19.0    | 0.249  |
|     | 2ijd_1 | RNA-directed RNA polymerase; RNA-dependent RNA polymerase, picornavirus, protease, hydrolase, transferase                        | <i>Human poliovirus 1</i> (Picornaviridae)              | 100.0    | 8.3E <sup>-46</sup> | 433.2 | 210-655 | 18.0    | 0.169  |
|     | 5f8h_A | Genome polyprotein; polymerase-RNA complex, elongation, nucleotide addition CYCL transferase-RNA complex                         | <i>Enterovirus A71</i> (Picornaviridae)                 | 100.0    | 6.6E <sup>-41</sup> | 377.4 | 211-655 | 17.0    | 0.197  |
|     | 4nyz_A | Genome polyprotein; encephalomyocarditis virus, close right hand, RNA dependent polymerase, transferase                          | <i>Mengo virus</i> (Picornaviridae)                     | 100.0    | 4.0E <sup>-40</sup> | 369.3 | 211-677 | 15.0    | 0.123  |
| 2   | 2kc5_A | Hydrogenase-2 operon protein HYBE; chaperone                                                                                     | <i>Escherichia coli</i>                                 | 23.0     | 29.0                | 33.1  | 91-200  | 30.0    | 0.501  |
|     | 1j26_A | Immature colon carcinoma transcript 1; peptide chain release factors, RF-1, the GGQ motif, immature carcinoma transcript 1       | <i>Mus musculus</i>                                     | 21.4     | 60.0                | 29.2  | 354-391 | 16.0    | 0.320  |

|        |                                                                                                   |                                                                                                                                                |                                       |                      |                      |         |         |       |       |
|--------|---------------------------------------------------------------------------------------------------|------------------------------------------------------------------------------------------------------------------------------------------------|---------------------------------------|----------------------|----------------------|---------|---------|-------|-------|
|        | 2jva_A                                                                                            | Peptidyl-tRNA hydrolase domain protein; GFT hydrolase, structural genomics, PSI-2, protein STRU initiative                                     | <i>Pseudomonas syringae</i> PV        | 20.2                 | 87.0                 | 28.0    | 353-397 | 11.0  | 0.163 |
| 3      | 1xxl_A                                                                                            | YCGJ protein; structural genomics, protein structure initiative, PSI, NEW YORK SGX research center for structural genomics, nysgxr             | <i>Bacillus subtilis</i>              | 99.8                 | 1.40E <sup>-17</sup> | 166.1   | 113-309 | 21.0  | 0.197 |
|        | 3dlc_A                                                                                            | Putative S-adenosyl-L-methionine-dependent methyltransferase; structural genomics, joint center for structural genomics                        | <i>Methanococcus maripaludis</i>      | 99.7                 | 5.0E <sup>-17</sup>  | 156.7   | 112-308 | 13.0  | 0.097 |
|        | 1vl5_A                                                                                            | Unknown conserved protein BH2331; putative methyltransferase, structural genomics, joint center structural genomics, JCSG                      | <i>Bacillus halodurans</i>            | 99.7                 | 3.0E <sup>-16</sup>  | 157.6   | 116-310 | 16.0  | 0.215 |
|        | 5fcd_A                                                                                            | MCCD, MCCD protein; methyltransferase fold, SAM binding, MCC bindi structural genomics, center for structural genomics of INFE diseases, csgid | <i>Escherichia coli</i>               | 99.7                 | 3.70E <sup>-16</sup> | 156.9   | 113-309 | 11.0  | 0.019 |
|        | 3ujc_A                                                                                            | Phosphoethanolamine N-methyltransferase; parasite                                                                                              | <i>Plasmodium falciparum</i>          | 99.7                 | 8.0E <sup>-17</sup>  | 163.0   | 114-308 | 14.0  | 0.124 |
|        | 2yqz_A                                                                                            | Hypothetical protein TTHA0223; RNA methyltransferase, SAM, structural genomics, NPPSFA                                                         | <i>Thermus thermophilus</i>           | 99.7                 | 9.6E <sup>-16</sup>  | 155.0   | 112-351 | 14.0  | 0.059 |
|        | 5egp_A                                                                                            | UBIE/COQ5 family methyltransferase, putative; BIS-thiomethyltransferase, gliotoxin, epipolythiodioxopiperazine aspergillus fumigatus           | <i>Aspergillus fumigatus</i> Z5       | 99.7                 | 5.6E <sup>-16</sup>  | 159.8   | 112-326 | 11.0  | 0.036 |
|        | 3bus_A                                                                                            | REBM, methyltransferase; rebeccamycin synthesis                                                                                                | <i>Lechevalieria aerocolonigenes</i>  | 99.7                 | 9.2E <sup>-16</sup>  | 155.4   | 113-308 | 17.0  | 0.151 |
|        | 3ccf_A                                                                                            | Cyclopropane-fatty-acyl-phospholipid synthase; YP_321342.1, putative methyltransferase                                                         | <i>Anabaena variabilis</i> atcc 29413 | 99.7                 | 1.9E <sup>-15</sup>  | 153.6   | 118-407 | 12.0  | 0.031 |
| 4kdc_A | 3-demethylubiquinone-9 3-methyltransferase; rossmann fold, O-methylation, ubiquinone biosynthesis | <i>Escherichia coli</i>                                                                                                                        | 99.67                                 | 1.3 E <sup>-15</sup> | 151.7                | 113-314 | 17.0    | 0.125 |       |
| 4      | 1b4u_A                                                                                            | LIGA, LIGB, protocatechuate 4,5-dioxygenase; extradiol type dioxygenase, non-heme iron protein                                                 | <i>Sphingomonas paucimobilis</i>      | 66.6                 | 3.1                  | 35.1    | 74-97   | 13.0  | 0.304 |
|        | 2ll2_A                                                                                            | GAP junction alpha-1 protein; membrane protein                                                                                                 | <i>Homo sapiens</i>                   | 58.0                 | 2.8                  | 27.4    | 210-217 | 63.0  | 1.228 |
|        | 4wj3_C                                                                                            | Glutamyl-tRNA(Gln) amidotransferase subunit C; transamidosome, aminoacyl-tRNA synthetase, gatcab, LIG complex                                  | <i>Pseudomonas aeruginosa</i> PAO1    | 55.2                 | 9.4                  | 29.2    | 17-51   | 23.0  | 0.257 |
|        | 3ip4_C                                                                                            | Aspartyl/glutamyl-tRNA(Asn/Gln) amidotransferase; multi protein complex, ligase, ATP-binding, nucleotide-binding protein biosynthesis          | <i>Staphylococcus aureus</i> subsp    | 54.2                 | 13.0                 | 27.8    | 19-51   | 18.0  | 0.301 |
|        | 3kfu_G                                                                                            | Glutamyl-tRNA(Gln) amidotransferase subunit C; ASPRS,                                                                                          | <i>Thermus thermophilus</i>           | 52.9                 | 14.0                 | 27.2    | 19-51   | 18.0  | 0.279 |

|     |        |                                                                                                                             |                                         |      |        |      |         |       |       |
|-----|--------|-----------------------------------------------------------------------------------------------------------------------------|-----------------------------------------|------|--------|------|---------|-------|-------|
|     |        | gatcab, ATP-binding, aminoacyl-tRNA synthetase, ligase nucleotide-binding, protein biosynthesis, ligase-RNA complete        |                                         |      |        |      |         |       |       |
|     | 1d2n_A | N-ethylmaleimide-sensitive fusion protein; hexamerization domain, ATPase, transport                                         | <i>Cricetulus griseus</i>               | 51.1 | 3.6    | 32.8 | 70-139  | 13.0  | 0.113 |
|     | 3wra_A | Gallate dioxygenase; oxidoreductase, extradiol dioxygenase, Fe <sup>2+</sup> binding, domain- dimer                         | <i>Sphingomonas paucimobilis</i>        | 46.8 | 7.9    | 35.9 | 74-97   | 21.0  | 0.427 |
|     | 3h0l_C | Glutamyl-tRNA(Gln) amidotransferase subunit C; multi protein complex, ligase, protein biosynthesis                          | <i>Aquifex aeolicus</i>                 | 40.0 | 31.0   | 25.4 | 21-51   | 23.0  | 0.371 |
|     | 3ur8_A | Glucan endo-1,3-beta-D-glucosidase; glucoside hydrolase, GH17 family, pathogenesis-related class protein (PR-2), TIM barrel | <i>Solanum tuberosum</i>                | 39.9 | 70.0   | 26.2 | 108-186 | 17.0  | 0.332 |
|     | 1aq0_A | 1,3-1,4-beta-glucanase; hydrolase, glycosidase, glycoprotein, glycosylated protein                                          | <i>Hordeum vulgare</i>                  | 34.3 | 61.0   | 26.3 | 114-186 | 24.0  | 0.342 |
|     | 2b7t_A | Double-stranded RNA-specific editase 1; RNA editing, RNA-binding protein, hydrolase                                         | <i>Rattus norvegicus</i>                | 24.3 | 160.0  | 35.1 | 168-206 | 24.0  | 0.248 |
| 5-1 | 2l0d_A | Cell surface protein                                                                                                        | <i>Methanosarcina acetivorans</i>       | 38.4 | 100 .0 | 20.5 | 200-254 | 19.0  | 0.315 |
|     | 3iym_A | Capsid protein; dsRNA virus, icosahedral virus, partitivirus, PSV-S                                                         | <i>Penicillium stoloniferum virus S</i> | 32.5 | 12.0   | 35.8 | 112-133 | 50.0  | 0.75  |
|     | 5ewn_A | Structural protein; virus protein, capsid protein, icosahedral virus, jelly-roll protein                                    | <i>Human astrovirus-1</i>               | 45.3 | 7.2.0  | 27.4 | 28-35   | 63.0  | 1.830 |
|     | 3nut_A | Precorrin-3 methylase; vitamin B12 pathway, cobalamin, methyltransferase, transfera                                         | <i>Rhodobacter capsulatus</i>           | 34.4 | 17.0   | 20.6 | 13-38   | 22.0  | 0.463 |
|     | 1t8h_A | YLMD protein sequence homologue; rbstp0554                                                                                  | <i>Geobacillus stearothermophilus</i>   | 33.7 | 12.0   | 23.5 | 3-8     | 100.0 | 1.752 |
| 5-2 | 3hag_A | Capsid protein; jelly-roll beta sheets, beta barrel, icosahedral virus                                                      | <i>Hepatitis e virus type 4</i>         | 33.7 | 13.0   | 27.3 | 28-35   | 38.0  | 1.016 |
|     | 1xfj_A | Conserved hypothetical protein; HYP protein, alpha-beta-BETA-alpha                                                          | <i>Caulobacter vibrioides</i>           | 33.3 | 10.0   | 23.5 | 3-8     | 83.0  | 1.486 |
|     | 1rv9_A | Conserved hypothetical protein NMB0706; alpha-beta-BETA-alpha structure                                                     | <i>Neisseria meningitidis</i>           | 31.7 | 11.0   | 23.7 | 3-8     | 83.0  | 1.298 |
|     | 1z9t_A | Hypothetical UPF0124 protein YFIH; putative laccase                                                                         | <i>Escherichia coli</i>                 | 30.8 | 12.0   | 23.4 | 3-8     | 83.0  | 1.298 |
|     | 2mxb_A | EPO-R, erythropoietin receptor; membrane protein                                                                            | <i>Mus musculus</i>                     | 28.4 | 6.8    | 21.6 | 3-10    | 63.0  | 0.974 |
| 6   | 4j8q_A | Putative uncharacterized protein; NIGD-like protein, PF12667 family                                                         | <i>Bacteroides fragilis</i>             | 61.4 | 4.6    | 30.5 | 145-176 | 22.0  | 0.232 |

|     |        |                                                                                                                                       |                                             |      |       |      |         |      |       |
|-----|--------|---------------------------------------------------------------------------------------------------------------------------------------|---------------------------------------------|------|-------|------|---------|------|-------|
|     | 3k6o_A | Uncharacterized protein DUF1344; protein of unknown function DUF1344                                                                  | <i>Bacteroides vulgatus</i> atcc 8482       | 59.7 | 4.0   | 30.7 | 143-173 | 29.0 | 0.393 |
|     | 3qwn_A | Hypothetical NIGD-like protein; SH3-like barrel fold                                                                                  | <i>Bacteroides caccae</i>                   | 41.5 | 8.7   | 29.4 | 139-166 | 14.0 | 0.176 |
|     | 2fhw_B | Relaxin 3 (prorelaxin H3) (insulin-like peptide INSL7) (insulin-like peptide 7); insulin/relaxin super-family fold, signaling protein | Synthetic                                   | 41.3 | 19.0  | 21.5 | 14-26   | 46.0 | 0.953 |
|     | 4pqx_A | Uncharacterized protein; NIGD-like protein, PF12667 family                                                                            | <i>Bacteroides caccae</i>                   | 38.4 | 13.0  | 28.5 | 155-183 | 34.0 | 0.502 |
|     | 2h8b_B | Insulin-like 3; insulin/relaxin superfamily fold, hormone/growth factor complex                                                       | Synthetic                                   | 37.6 | 22.0  | 21.7 | 14-26   | 46.0 | 1.025 |
|     | 6rlx_B | Relaxin, B-chain; hormone(muscle relaxant)                                                                                            | <i>Homo sapiens</i>                         | 29.8 | 19.0  | 21.5 | 14-26   | 38.0 | 0.600 |
|     | 4c5i_C | Transcriptional repressor protein YY1                                                                                                 | <i>Homo sapiens</i>                         | 28.6 | 25.0  | 21.7 | 23-30   | 50.0 | 1.315 |
|     | 3k0y_A | Putative toxin related protein                                                                                                        | <i>Parabacteroides distasonis</i> atcc 8503 | 23.2 | 30.0  | 26.9 | 146-171 | 38.0 | 0.539 |
|     | 2kbc_B | INSL5 B-chain; peptide hormone, relaxin, insulin-like fold                                                                            | Synthetic                                   | 22.6 | 21.0  | 20.9 | 11-23   | 31.0 | 0.567 |
| 7   | 2raa_A | Pyruvate synthase subunit PORC; TM0015, pyruvate oxidoreductase subunit PORC (EC 1.2.7.1), S genomics                                 | <i>Thermotoga maritima</i> MSB8             | 37.1 | 3.8   | 30.7 | 122-154 | 30.0 | 0.420 |
|     | 3g2e_A | OORC subunit of 2-oxoglutarate:acceptor oxidoreductase                                                                                | <i>Campylobacter jejuni</i>                 | 34.4 | 4.0   | 30.0 | 122-154 | 30.0 | 0.379 |
|     | 1j6q_A | Cytochrome C maturation protein E; all-beta protein, heme delivery, cytochrome C maturation, OB-(oligonucleotide binding)fold         | <i>Shewanella putrefaciens</i>              | 30.0 | 10.0  | 28.6 | 128-156 | 28.0 | 0.630 |
|     | 1sr3_A | APO-CCME; OB fold, beta barrel, flexible C-terminal domain, chaperone                                                                 | <i>Escherichia coli</i>                     | 28.0 | 13.0  | 28.2 | 128-156 | 31.0 | 0.547 |
|     | 2ws9_1 | P1                                                                                                                                    | <i>Equine rhinitis a virus</i>              | 25.0 | 68.0  | 24.6 | 40-100  | 22.0 | 0.416 |
|     | 2he9_A | NK-tumor recognition protein; cyclosporin, isomerase, membrane, repeat, rotamase, peptidylprolyl isomerase                            | <i>Homo sapiens</i>                         | 24.7 | 70.0  | 24.0 | 105-149 | 20.0 | 0.256 |
|     | 3on3_A | Keto/oxoacid ferredoxin oxidoreductase, gamma SUB                                                                                     | <i>Geobacter sulfurreducens</i>             | 24.4 | 4.0   | 29.7 | 122-154 | 24.0 | 0.449 |
|     | 5cfc_A | Genome polyprotein, VP1; virion, capsid, pathogen                                                                                     | <i>Saffold virus</i>                        | 21.2 | 78.0  | 24.8 | 40-100  | 17.0 | 0.544 |
|     | 4i9y_A | E3 SUMO-protein ligase ranbp2; nuclear pore complex, transport protein                                                                | <i>Homo sapiens</i>                         | 21.0 | 130.0 | 21.8 | 110-149 | 18.0 | 0.227 |
|     | 1tme_1 | Chain 1, Three-Dimensional Structure Of Theiler Virus                                                                                 | murine encephalomyelitis virus              | 20.3 | 100.0 | 24.9 | 40-100  | 19.0 | 0.491 |
| 8-1 | 3ie4_A | GRAM-negative binding protein 3; immunoglobulin fold, immune system                                                                   | <i>Drosophila melanogaster</i>              | 32.5 | 2.0   | 25.1 | 56-105  | 26.0 | 0.460 |
|     | 2f6k_A | Metal-dependent hydrolase; metal dependent hydrolyse, aminohydro_2, ACMDS, ACMS, trypto metabolism,                                   | <i>Lactobacillus plantarum</i>              | 30.5 | 14.0  | 27.4 | 29-47   | 22.0 | 0.416 |

|        |                                                                                                                                                |                                    |                            |      |      |         |      |       |       |
|--------|------------------------------------------------------------------------------------------------------------------------------------------------|------------------------------------|----------------------------|------|------|---------|------|-------|-------|
|        | quinolinic acid, QUIN                                                                                                                          |                                    |                            |      |      |         |      |       |       |
| 3aqy_A | Beta-1,3-glucan-binding protein; beta-sandwich, immune receptor, sugar bindi protein                                                           | <i>Plodia interpunctella</i>       | 29.3                       | 24.0 | 24.8 | 79-105  | 30.0 | 0.708 |       |
| 2kha_A | Beta-1,3-glucan-binding protein; glycoprotein, immune response, innate immunity, SEC sugar binding protein                                     | <i>Plodia interpunctella</i>       | 26.7                       | 37.0 | 25.3 | 79-105  | 33.0 | 0.736 |       |
| 4dm5_A | Osmotically inducible lipoprotein OSME; unknown function                                                                                       | <i>Pseudomonas aeruginosa</i> PAO1 | 26.0                       | 39.0 | 23.8 | 52-119  | 17.0 | 0.158 |       |
| 2hbv_A | 2-amino-3-carboxy muconate 6-semialdehyde decarbox; ACMSD, TIM-barrel, decarboxylase, metalloenzyme, lyase                                     | <i>Pseudomonas fluorescens</i>     | 24.3                       | 29.0 | 25.9 | 29-47   | 50.0 | 0.802 |       |
| 2gfg_A | BH2851; antiparallel barrel, structural genomics, joint center for S genomics, JCSG, protein structure initiative, PSI-2, unknow function      | <i>Bacillus halodurans</i>         | 23.9                       | 78.0 | 21.7 | 32-60   | 24.0 | 0.310 |       |
| 2krc_A | DNA-directed RNA polymerase subunit delta; delta subunit, GRAM-positive bacteria, nucleotidyltransferase, transcription, transferase           | <i>Bacillus subtilis</i>           | 23.7                       | 20.0 | 25.4 | 59-78   | 40.0 | 0.883 |       |
| 3ij6_A | Uncharacterized metal-dependent hydrolase; structural genomics, amidohydrolase, PSI-2, protein structure                                       | <i>Lactobacillus acidophilus</i>   | 23.5                       | 31.0 | 25.5 | 29-47   | 33.0 | 0.676 |       |
| 4do7_A | Amidohydrolase 2; enzyme function initiative, EFI, structural TIM-barrel fold, putative lactonase                                              | <i>Burkholderia multivorans</i>    | 22.7                       | 31.0 | 25   | 31-47   | 50.0 | 0.922 |       |
| 2lxt_C | Cyclic AMP-responsive element-binding protein 1; CREB binding protein                                                                          | <i>Homo sapiens</i>                | 22.4                       | 27.0 | 22.2 | 123-137 | 47.0 | 0.769 |       |
| 4ofc_A | 2-amino-3-carboxy muconate-6-semialdehyde decarbox; TIM-barrel, decarboxylase, oxidoreductase                                                  | <i>Homo sapiens</i>                | 20.4                       | 38.0 | 25.3 | 29-47   | 39.0 | 0.641 |       |
| 8-2    | 4nar_A                                                                                                                                         | Putative uronate isomerase         | <i>Thermotoga maritima</i> | 48.6 | 8.7  | 25.9    | 6-32 | 35.0  | 0.386 |
| 3tmm_A | Transcription factor A, mitochondrial; HMG, high mobility group, transcription, LSP1, mitochon transcription-DNA complex                       | <i>Homo sapiens</i>                | 38.7                       | 8.3  | 23   | 27-47   | 38.0 | 0.631 |       |
| 2zaj_A | Membrane-associated guanylate kinase, WW and PDZ domain-containing protein 1; BAI1-associated protein 1 (BAP-1)                                | <i>Homo sapiens</i>                | 30.3                       | 13.0 | 16.6 | 28-44   | 41.0 | 0.585 |       |
| 3oun_A | Putative uncharacterized protein TB39.8; peptidoglycan, Ser/Thr kinase, pseudokinase, FHA domain, REG phosphorylation                          | <i>Mycobacterium tuberculosis</i>  | 30.2                       | 14.0 | 21.6 | 27-47   | 38.0 | 0.637 |       |
| 5ctq_A | Squamous cell carcinoma antigen recognized by T-C; half A tetratricopeptide repeat (HAT) domain, protein transp immune system, nuclear protein | <i>Homo sapiens</i>                | 27.2                       | 17.0 | 22.1 | 28-46   | 42.0 | 0.695 |       |

|        |                                                                                              |                              |      |      |      |       |      |       |
|--------|----------------------------------------------------------------------------------------------|------------------------------|------|------|------|-------|------|-------|
| 2dal_A | Protein KIAA0794; FAS associated factor 1, UBA-like domain, structuralgenomics, NPPSFA       | <i>Homo sapiens</i>          | 27.0 | 16.0 | 17.7 | 28-34 | 71.0 | 0.928 |
| 2plj_A | Lysine/ornithine decarboxylase; type IV decarboxylase, beta/alpha barrel, beta barrel, lyase | <i>Vibrio vulnificus</i>     | 26.8 | 17.0 | 23.4 | 27-46 | 40.0 | 0.702 |
| 4xvc_A | Esterase E40; hydrolase                                                                      | <i>Environmental samples</i> | 21.3 | 27.0 | 20.0 | 27-47 | 38.0 | 0.631 |

\*No, Index of deduced protein from ORFs 1 to 8-2 of dsRNAs 1 to 8, respectively; Hit, domain ID and beginning of description of the matched database domain; Homology protein, Predicted homology proteins by HHpred tool with the inquiry; Host, from which the predicted proteins derived; Prob, Probability of template to be a true positive; E-value: Expect-value; Score, Raw score. The raw score is calculated by comparing the amino acid distributions between columns from the query alignment and columns from the template alignment; Query, Range of query match states aligned.

**Supplementary Table 4** Virus names, GenBank accession numbers, taxonomic statuses, genomic numbers, and virion morphologies of the isolates used for the RdRp phylogenetic analysis shown in Supplementary Fig. 2.

| Virus name                                   | Abbreviation | GenBank Acc.no. | Genus*        | Family**   | Genome *** | Structure      |
|----------------------------------------------|--------------|-----------------|---------------|------------|------------|----------------|
| Colletotrichum camelliae filamentous virus 1 | CcFV-1       | KX778766        | /             | /          | 8 ds       | Filamentous    |
| Aspergillus fumigatus tetramycovirus-1       | AFuTmV-1     | CDP74618        | /             | /          | 4 ds       | non-particle   |
| Beauveria bassiana polmycovirus-1            | BbPmV-1      | LN896307        | /             | /          | 4 ds       | non-particle   |
| Beauveria bassiana polmycovirus-2            | BbPmV-2      | LN896318        | /             | /          | 7 ds       | non-particle   |
| Botryosphaeria dothidea virus 1              | BdRV1        | KP245734        | /****         | /          | 5 ds       | unknown        |
| White clover cryptic virus 1                 | WccV         | AAU14889        | Alphapartiti- | Partiti-   | 2 ds       | Icosahedral    |
| Penicillium stoloniferum virus S             | PsV-S        | YP_052857       | Gammapartiti- | Partiti-   | 2 ds       | Icosahedral    |
| Citrullus lanatus cryptic virus              | CLCV         | AGH12859        | Deltapartiti- | Partiti-   | 2 ds       | Icosahedral    |
| Black raspberry cryptic virus                | BRCV         | ABU55400        | Deltapartiti- | Partiti-   | 2 ds       | Icosahedral    |
| Persimmon cryptic virus                      | PeCV         | CCH50609        | Deltapartiti- | Partiti-   | 2 ds       | Icosahedral    |
| Mycoreovirus 1                               | MyRV1        | AAP45577        | Mycoreo-      | Reo-       | 10-12 ds   | double-shelled |
| Mycoreovirus 3                               | MyRV3        | YP_392478       | Mycoreo-      | Reo-       | 10-12 ds   | double-shelled |
| Saccharomyces cerevisiae virus L-A           | ScV-L-A      | AAA50321        | Toti-         | Toti-      | 1 ds       | Icosahedral    |
| Helminthosporium victoriae 190S virus        | Hv190SV      | O57044          | Victori-      | Toti-      | 1 ds       | Icosahedral    |
| Penicillium chrysogenum virus                | PcV          | YP_392482       | Chryso-       | Chryso-    | 4 ds       | Icosahedral    |
| Verticillium chrysogenum virus               | VcV          | ADG21213        | Chryso-       | Chryso-    | 4 ds       | Icosahedral    |
| Rosellinia necatrix quadrivirus 1            | RnQV1        | BAM93353        | Quadri-       | Quadri-    | 4 ds       | Icosahedral    |
| Rosellinia necatrix megabirnavirus 1         | RnMBV1       | YP_003288763    | Megabirna-    | Megabirna- | 2 ds       | Icosahedral    |
| Sclerotinia sclerotiorum megabirnavirus 1    | SsMBV1       | YP_009143529    | Megabirna-    | Megabirna- | 2 ds       | Icosahedral    |
| Phytophthora endornavirus 1                  | PEV1         | YP_241110       | Endorna-      | Endorna-   | 1 ds       | non-particle   |
| Helicobasidium mompa endornavirus 1          | HmEV1        | YP_003280846    | Endorna-      | Endorna-   | 1 ds       | non-particle   |
| Human picobirnavirus                         | HPV          | AHX00960        | Picobirna-    | Picobirna- | 2 ds       | Icosahedral    |
| Norovirus                                    | NV           | AJT43260        | Noro-         | Calici-    | 1 +ss      | Icosahedral    |
| Rabbit hemorrhagic disease virus             | RHDV         | NP_740332       | Lago-         | Calici-    | 1 +ss      | Icosahedral    |
| Murine norovirus 1                           | MNV-1        | YP_720001       | Noro-         | Calici-    | 1 +ss      | Icosahedral    |
| Turkey avisivirus                            | TuASV        | AGH06056        | Avisiviru     | Picornal-  | 1 +ss      | Icosahedral    |
| Duck hepatitis A virus                       | DHAV         | AHJ78642        | Avihepato-    | Picornal-  | 1 +ss      | Icosahedral    |
| Avian nephritis virus 2                      | ANV-2        | ADQ43328        | Avastro-      | Astro-     | 1 +ss      | Icosahedral    |
| Duck astrovirus 1                            | DAstV1       | ADB79803        | Avastro-      | Astro-     | 1 +ss      | Icosahedral    |

\* and \*\*, '-' refer to omitted 'virus' and 'viridae', respectively; \*\*\*, ds, double stranded RNA, +ss, positive single stranded RNA, \*\*\*\*, the taxonomic status is unclear.

**Supplementary Table 5** Summary of the peptide mass fingerprinting analysis of p80 and p70.

| Species                                  | Protein                          | Calculated Mass | Observed Mass | ± delta | Amino acid sequence              | Ion score | GenBank accession no. |
|------------------------------------------|----------------------------------|-----------------|---------------|---------|----------------------------------|-----------|-----------------------|
| <i>Colletotrichum gloeosporioides</i> *  | glucoamylase                     | 1119.6288       | 1120.644      | 1.0152  | VVTQFGQTIK                       | 27        | gi 596650956          |
|                                          |                                  | 1445.6616       | 1446.6581     | 0.9965  | TDPPYFYTWTR                      | 59        |                       |
|                                          |                                  | 1736.8733       | 1737.8754     | 1.0021  | NGYSSTASSVLWPVIR                 | 120       |                       |
|                                          |                                  | 1782.9265       | 1783.9215     | 0.9950  | QQGSITVTQTSLAFFR                 | 110       |                       |
|                                          |                                  | 1932.0428       | 1933.0355     | 0.9927  | TIYTINNGIAQSAIAVGR               | 125       |                       |
|                                          |                                  | 1967.8948       | 1968.8949     | 1.0001  | FWSPSGNFMVANINGNGR               | 84        |                       |
|                                          |                                  | 2582.2401       | 2583.2085     | 0.9684  | SNGQPLSADDLTWSYAAFLTAAQR         | 153       |                       |
|                                          |                                  | 3028.489        | 3029.438      | 0.9490  | AVVDIFTNSYDANLQTNIQNYIASQAR      | 233       |                       |
| <i>Colletotrichum higginsianum</i>       | glycosyl hydrolase family 15     | 1782.9265       | 1783.9215     | 0.9950  | QQGSITVTQTSLAFFR                 | 110       | gi 380482789          |
|                                          |                                  | 1932.0316       | 1933.0355     | 1.0039  | TIYVINNGIAQSAIAVGR               | 85        |                       |
|                                          |                                  | 2582.2401       | 2583.2085     | 0.9684  | SNGQPLSADDLTWSYAAFLTAAQR         | 153       |                       |
| <i>Colletotrichum gloeosporioides</i>    | hypothetical protein CGLO_02068  | 1049.5182       | 1050.5236     | 1.0054  | VFDEWNIK                         | 44        | gi 530478401          |
|                                          |                                  | 1465.7202       | 1466.7201     | 0.9999  | AKPGVESFDDFVR                    | 69        |                       |
|                                          |                                  | 1795.9006       | 1796.8912     | 0.9906  | VPNYHAPGEFIQPTAR                 | 106       |                       |
|                                          |                                  | 3076.5658       | 3077.521      | 0.9552  | AAGVEPIVDLPGVGLNFQDHYLTFSVYR     | 73        |                       |
| <i>Colletotrichum gloeosporioides</i> ** | calpain family cysteine protease | 1341.6313       | 1342.6388     | 1.0075  | NQTGSDALYFAC                     | 94        | gi 530474949          |
|                                          |                                  | 1401.6425       | 1402.6448     | 1.0023  | GSEWYNPGSIHV                     | 62        |                       |
|                                          |                                  | 1470.8042       | 1471.8074     | 1.0032  | AGTAVIVLTQLDDY                   | 97        |                       |
|                                          |                                  | 1571.842        | 1572.84       | 0.9980  | SGLALGHAYSILQSE                  | 86        |                       |
|                                          |                                  | 1598.8992       | 1599.9005     | 1.0013  | KAGTAVIVLTQLDDY                  | 56        |                       |
|                                          |                                  | 1777.7544       | 1778.7506     | 0.9962  | SESGVGEWNGPWSDGSE                | 96        |                       |
|                                          |                                  | 2418.138        | 2419.1331     | 0.9951  | VDWIFESPQFTVNGYSSSDIQ            | 49        |                       |
|                                          |                                  | 2654.2475       | 2655.2388     | 0.9913  | ELVNADGEFVFALAAMGTGWDWQS         | 30        |                       |
|                                          |                                  | 3276.4994       | 3277.4429     | 0.9435  | VHGDYEAISGGWPGEAVEDMTGGVTSTIATNV | 190       |                       |
| <i>Colletotrichum gloeosporioides</i>    | calpain-like protein             | 1341.6313       | 1342.6388     | 1.0075  | NQTGSDALYFAC                     | 94        | gi 596659795          |
|                                          |                                  | 1470.8042       | 1471.8074     | 1.0032  | AGTAVIVLTQLDDY                   | 97        |                       |
|                                          |                                  | 1571.842        | 1572.84       | 0.9980  | SGLALGHAYSILQSE                  | 86        |                       |
|                                          |                                  | 1598.8992       | 1599.9005     | 1.0013  | KAGTAVIVLTQLDDY                  | 56        |                       |
|                                          |                                  | 2003.9781       | 2004.9677     | 0.9896  | GFEGQYYFELHFVLQT                 | 53        |                       |
|                                          |                                  | 3276.4994       | 3277.4429     | 0.9435  | VHGDYEAISGGWPGEAVEDMTGGVTSTIATNV | 190       |                       |
| <i>Colletotrichum gloeosporioides</i>    | glucoamylase                     | 1735.8734       | 1736.8807     | 1.0073  | NGYSSTASSVLWPVIN                 | 51        | gi 596650956          |
|                                          |                                  | 1933.0216       | 1934.0289     | 1.0073  | TIYTINNGIAQSAIAVGY               | 77        |                       |
|                                          |                                  | 1968.8777       | 1969.885      | 1.0073  | FWSPSGNFMVANINGNGS               | 47        |                       |
|                                          |                                  | 2582.197        | 2583.2043     | 1.0073  | SNGQPLSADDLTWSYAAFLTAAOH         | 130       |                       |
|                                          |                                  | 3028.4258       | 3029.4331     | 1.0073  | AVVDIFTNSYDANLQTNIQNYIASQAL      | 96        |                       |
| <i>Colletotrichum salicis</i>            | calpain family cysteine protease | 1341.6565       | 1342.6388     | 0.9823  | LQTGSDALYFAC                     | 77        | gi 996612876          |
|                                          |                                  | 1571.842        | 1572.84       | 0.9980  | SGLALGHAYSILQSR                  | 86        |                       |

\* and \*\*, the peptided match p80 (above panel) and p70 (below panel), respectively.



**Supplementary Table 6** Summary of the peptide mass fingerprinting analysis of p31 encoded by ORF4 of CcFV-1 dsRNA4.

| Amino acid position                     | Calculated Mass | Observed Mass | $\pm$ delta | Amino acid sequence         | Ion score |
|-----------------------------------------|-----------------|---------------|-------------|-----------------------------|-----------|
| 2-12                                    | 1174.5506       | 1175.5690     | -1.0184     | SSSASYSFLGK                 | 46        |
| 18-31                                   | 1452.8552       | 1453.8771     | -1.0219     | VAALDQGVVELVIK              | 107       |
| 37-53                                   | 1769.0087       | 1770.0342     | -1.0255     | LKPPALLAYATEVAQGK           | 48        |
| 54-79                                   | 2754.4817       | 2755.4927     | -1.0110     | VPTAALSVDGTPKPVTIQAHSWLNDPR | 31        |
| 54-79                                   | 2786.4715       | 2787.4915     | -1.0200     | VPTAALSVDGTPKPVTIQAHSWLNDPR | 26        |
| 85-93                                   | 1052.4774       | 1053.4955     | -1.0181     | YGVSEEDVR                   | 80        |
| 110-119                                 | 1133.6445       | 1134.6648     | -1.0203     | ISAIVTDFLR                  | 82        |
| 110-120                                 | 1261.7394       | 1262.7578     | -1.0184     | ISAIVTDFLRK                 | 35        |
| 129-149                                 | 1980.9865       | 1982.0178     | -1.0313     | VVSTGDPGTNPATANPLAGSR       | 104       |
| 150-160                                 | 1164.6139       | 1165.6340     | -1.0201     | GLVASYASEIR                 | 95        |
| 161-178                                 | 2000.8752       | 2001.9031     | -1.0279     | SNSGVYGSYTFETFETGR          | 125       |
| 179-199                                 | 2275.1485       | 2276.1777     | -1.0292     | DVTQAFGVDLGHEVYVLAQSK       | 68        |
| 215-231                                 | 1884.9621       | 1885.9900     | -1.0279     | TDPLALPYIYYISSGGR           | 105       |
| Note: The overall protein score is 692. |                 |               |             |                             |           |

**Supplementary Table 7** Families and genera of filamentous viruses and dsRNA viruses listed according to the nature of the genome presented in the 9<sup>th</sup> International Committee on Taxonomy of Viruses (ICTV) <sup>2</sup>.

| Family or unassigned genus       | Nature of the genome | Morphology                                  | Virion size (nm)                                                     | Genome configuration   | Genome size (kbp or kb)                                          | Host           | Group |
|----------------------------------|----------------------|---------------------------------------------|----------------------------------------------------------------------|------------------------|------------------------------------------------------------------|----------------|-------|
| <i>Lipothrixviridae</i>          | dsDNA                | filamentous                                 | 24-38×410-2200                                                       | 1 linear segment       | 16-42                                                            | Ar             | I     |
| <i>Inoviridae</i> ;<br>inoviruse | ssDNA(+)             | filamentous                                 | 7×700-3500                                                           | circular genome        | 5.8-12.4                                                         | B              | II    |
| <i>Ophioviridae</i>              | ssRNA (-)            | filamentous, coiled                         | 3×≥760                                                               | 3 or 4 linear segments | 7.6-8.2, 1.6-1.8, 1.5, 1.4                                       | P              | V     |
| <i>Tenuivirus</i>                | ssRNA (+/-)          | filamentous                                 | 3-10×>100                                                            | 4-6 linear segments    | total genome: 17-23                                              | P, I           | V     |
| <i>Alphaflexiviridae</i>         | ssRNA (+)            | filamentous                                 | 10-15 × 470-800                                                      | 1 linear segment       | 6-9                                                              | P,F            | IV    |
| <i>Betaflexiviridae</i>          | ssRNA (+)            | filamentous                                 | 10-15 ×600-1000                                                      | 1 linear segment       | 6-9                                                              | P              | IV    |
| <i>Gammaflexiviridae</i>         | ssRNA (+)            | filamentous                                 | 13×720                                                               | 1 linear segment       | 7                                                                | F              | IV    |
| <i>Closteroviridae</i>           | ssRNA (+)            | filamentous                                 | 12× 650-2000                                                         | 1-3 linear segments    | monopartite:13-19;<br>bipartite: 8-9,<br>tripartite: 8, 5.3, 3.9 | P              | IV    |
| <i>Potyviridae</i>               | ssRNA (+)            | filamentous                                 | monopartite:11-15 ×650-900;<br>bipartite: 11-15 ×250-300 and 500-600 | 1 or 2 linear segments | monopartite: 9.3-10.8; bipartite: 7.3-7.6, 3.5-3.7               | P              | IV    |
| <i>Birnaviridae</i>              | dsRNA                | icosahedral                                 | 65                                                                   | 2 linear segments      | 3.5, 3                                                           | V, I           | III   |
| <i>Chrysoviridae</i>             | dsRNA                | icosahedral                                 | 35-40                                                                | 4 linear segments      | 3.6, 3.2, 3.0, 2.9                                               | F              | III   |
| <i>Cystoviridae</i>              | dsRNA                | spherical                                   | 85                                                                   | 3 linear segments      | 6.4-7.1, 3.6-4.7, 2.6-3.2                                        | B              | III   |
| <i>Endornaviridae</i>            | dsRNA                | pleomorphic RNA-containing vesicles         | no virions; viral RNA contained in cytoplasmic vesicles              | 1 linear segment       | 14-18                                                            | P, F, O        | III   |
| <i>Partitiviridae</i>            | dsRNA                | icosahedral                                 | 30-43                                                                | 2 linear segments      | 1.4-2.4 per segment                                              | P, F           | III   |
| <i>Picobirnaviridae</i>          | dsRNA                | icosahedral                                 | 33-37                                                                | 2 linear segments      | 2.4-2.6, 1.5-1.9                                                 | V              | III   |
| <i>Reoviridae</i>                | dsRNA                | turreted or non-turreted icosahedral capsid | 60-85                                                                | 9-12 linear segments   | total genome: 19-32                                              | F, I, P, V, Pr | III   |
| <i>Totiviridae</i>               | dsRNA                | icosahedral                                 | 33-40                                                                | 1 linear segment       | 4-7                                                              | F, Pr          | III   |

Abbreviations of the virus hosts: Algae, Al; Archaea, Ar; Bacteria, B; Fungi, F; Invertebrates, I; Plants, P; Protozoa, Pr; Vertebrates, V; Oomycete, O.

## Supplementary References

- 1 Wang, L. *et al.* Hypovirulence of the phytopathogenic fungus *Botryosphaeria dothidea*: Association with a coinfecting chrysovirus and a partitivirus. *J. Virol.* **88**, 7517-7527 (2014).
- 2 Abergel, C. *et al.* *Virus Taxonomy: Ninth Report of the International Committee on Taxonomy of Viruses.* 23-1196 (Elsevier Academic Press, 2011).
